# Supplementary material for: Preservation stress resistance of melanin deficient conidia from Paecilomyces variotii and Penicillium roqueforti mutants generated via CRISPR/Cas9 genome editing
Source: PubMed Central journal article supplement (PMC8017634; doi:10.1186/s40694-021-00111-w), 2021-04-02

**A.**

Primer combination Pva\_pksAP22f and Pva\_pksAP23r

Expected band sizes mutant: 2619 bps

wild-type: 9344 bps (too large so no band)

transformants #1-#8  
Wild-type

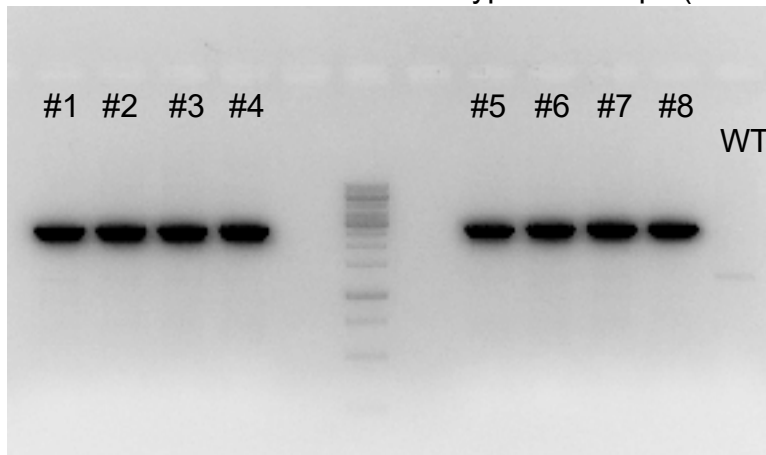

**B.**

Primer combination Pva\_pksAP19f and Pva\_pksAP20r

Expected band sizes mutant: - (no gene present)

wild-type: 1095 bps

transformants #1-#8  
Wild-type

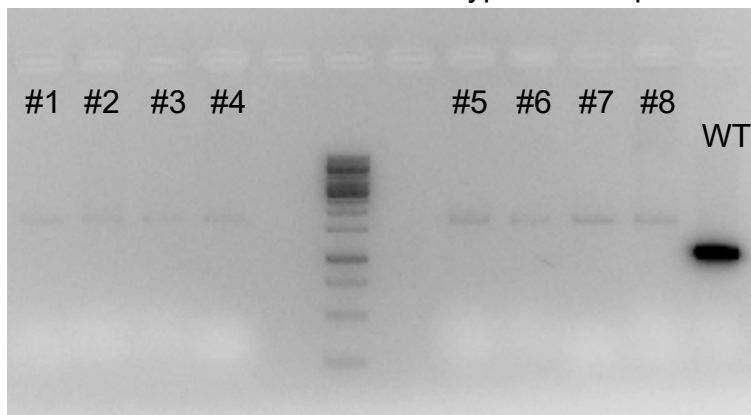

Supplement: 40694_2021_111_MOESM4_ESM.pdf [file 40694_2021_111_MOESM4_ESM.pdf]
