# Supplementary material for: Preservation stress resistance of melanin deficient conidia from Paecilomyces variotii and Penicillium roqueforti mutants generated via CRISPR/Cas9 genome editing
Source: PubMed Central journal article supplement (PMC8017634; doi:10.1186/s40694-021-00111-w), 2021-04-02

**A.**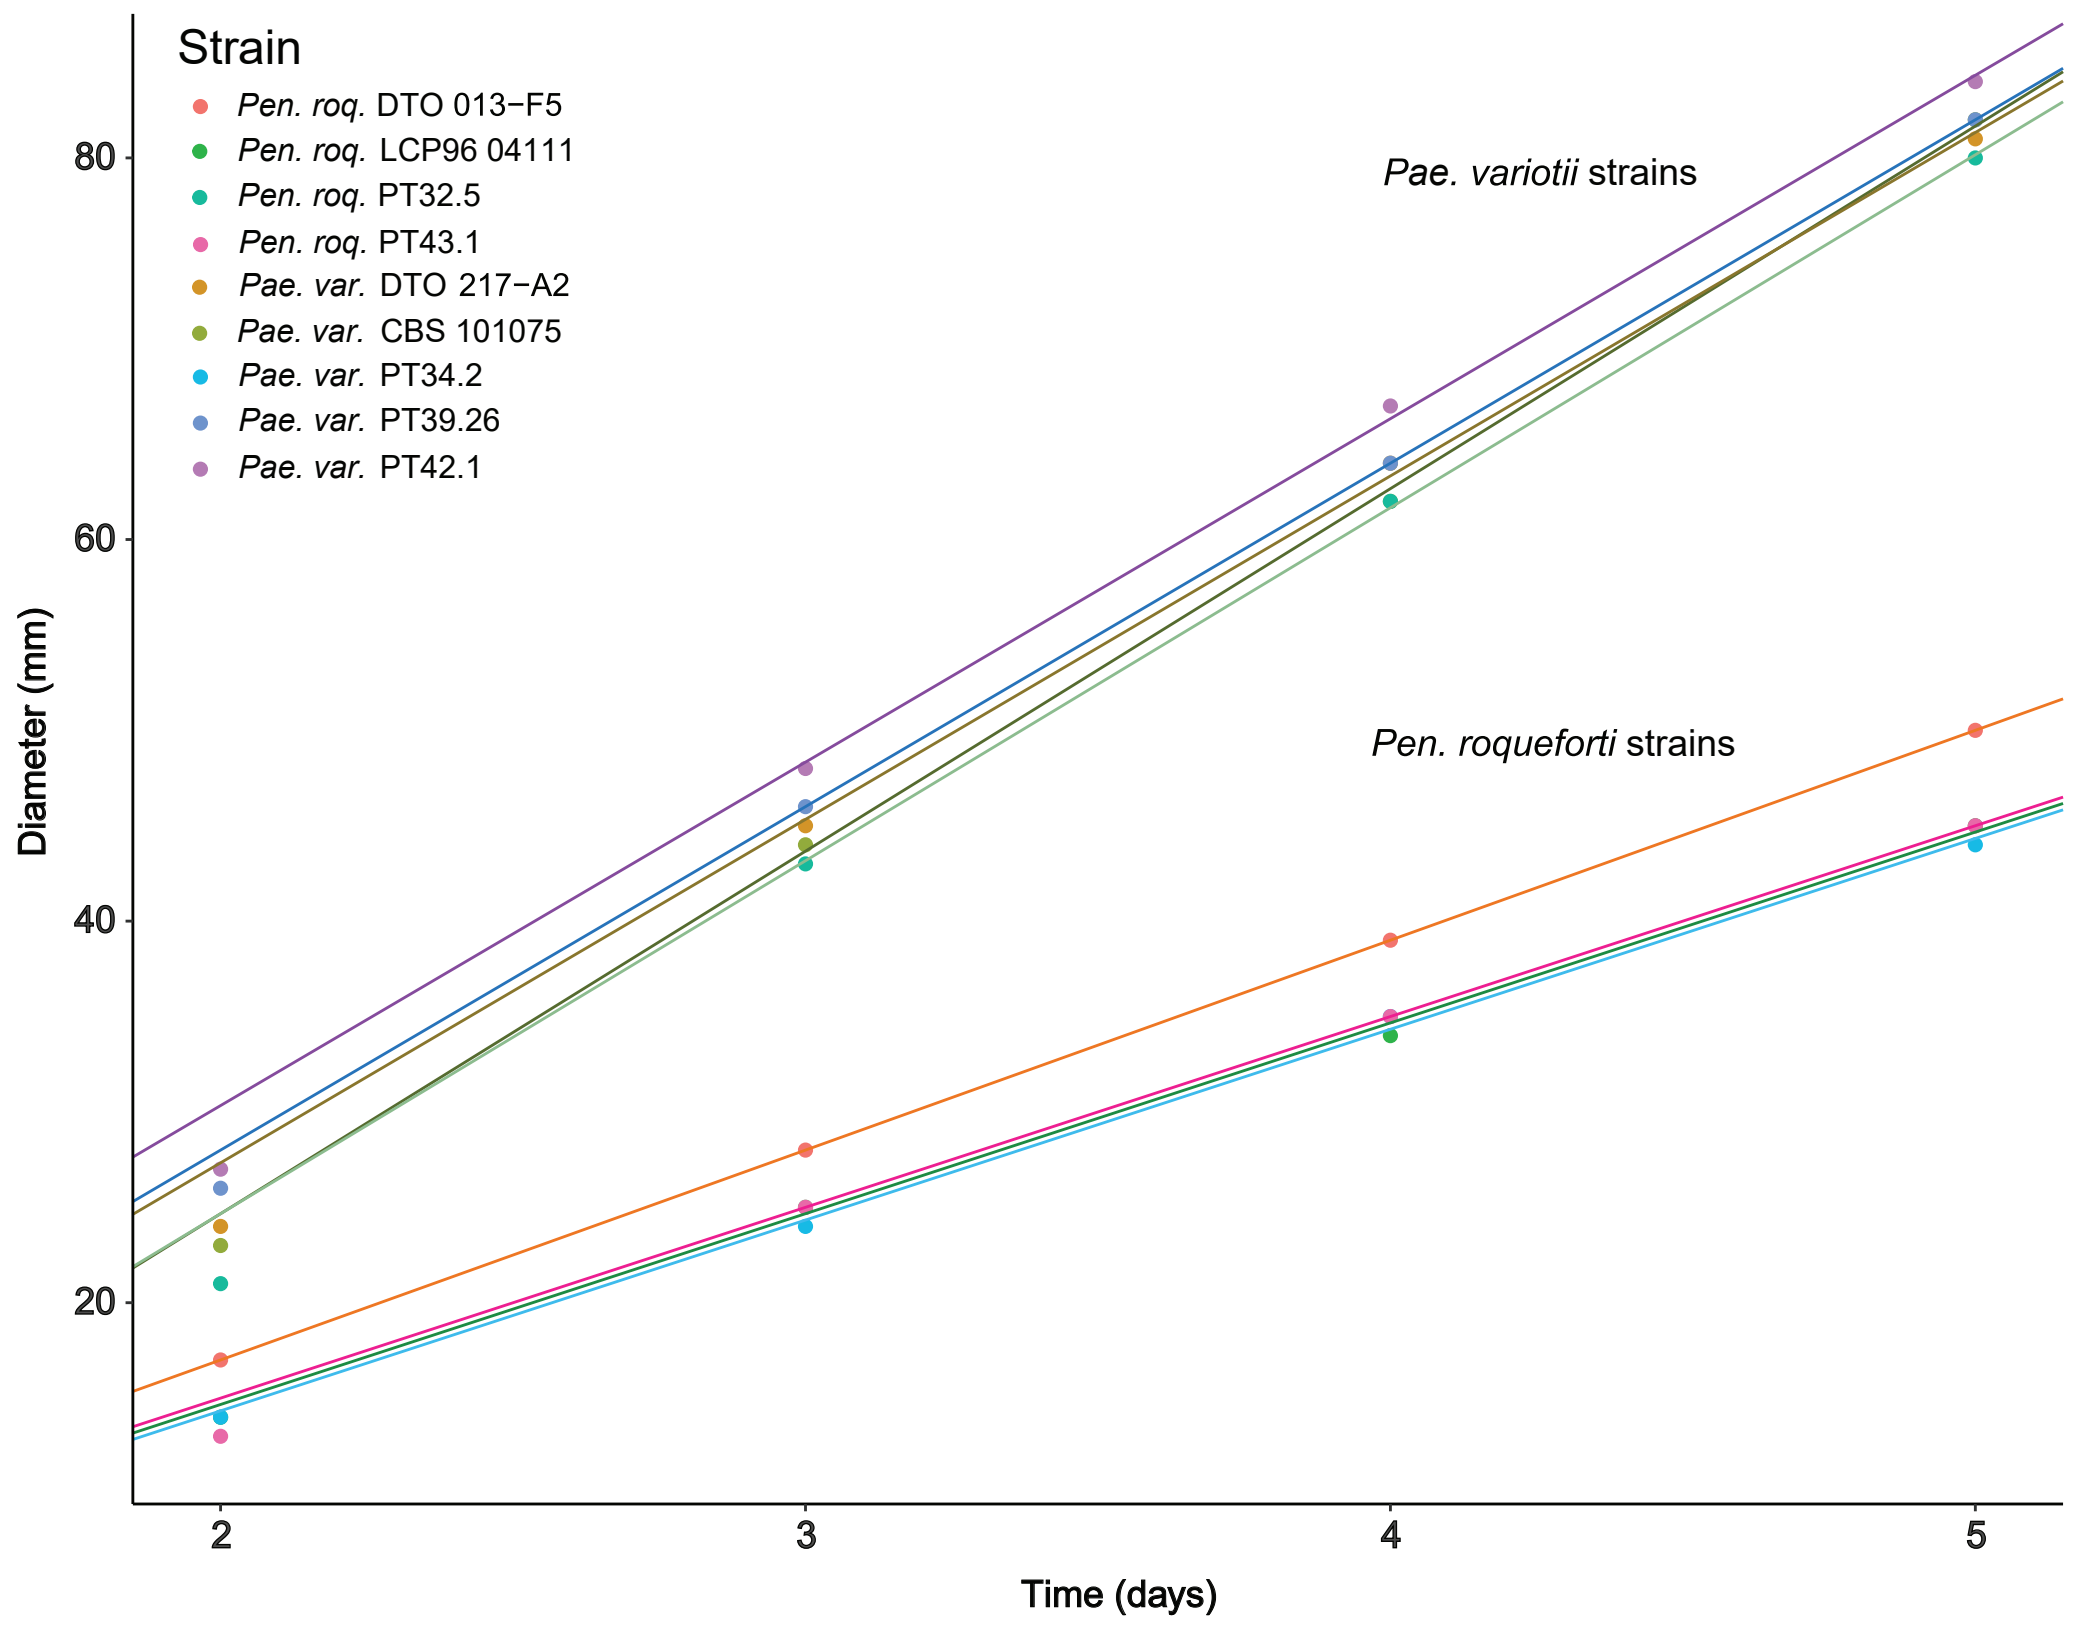**B.**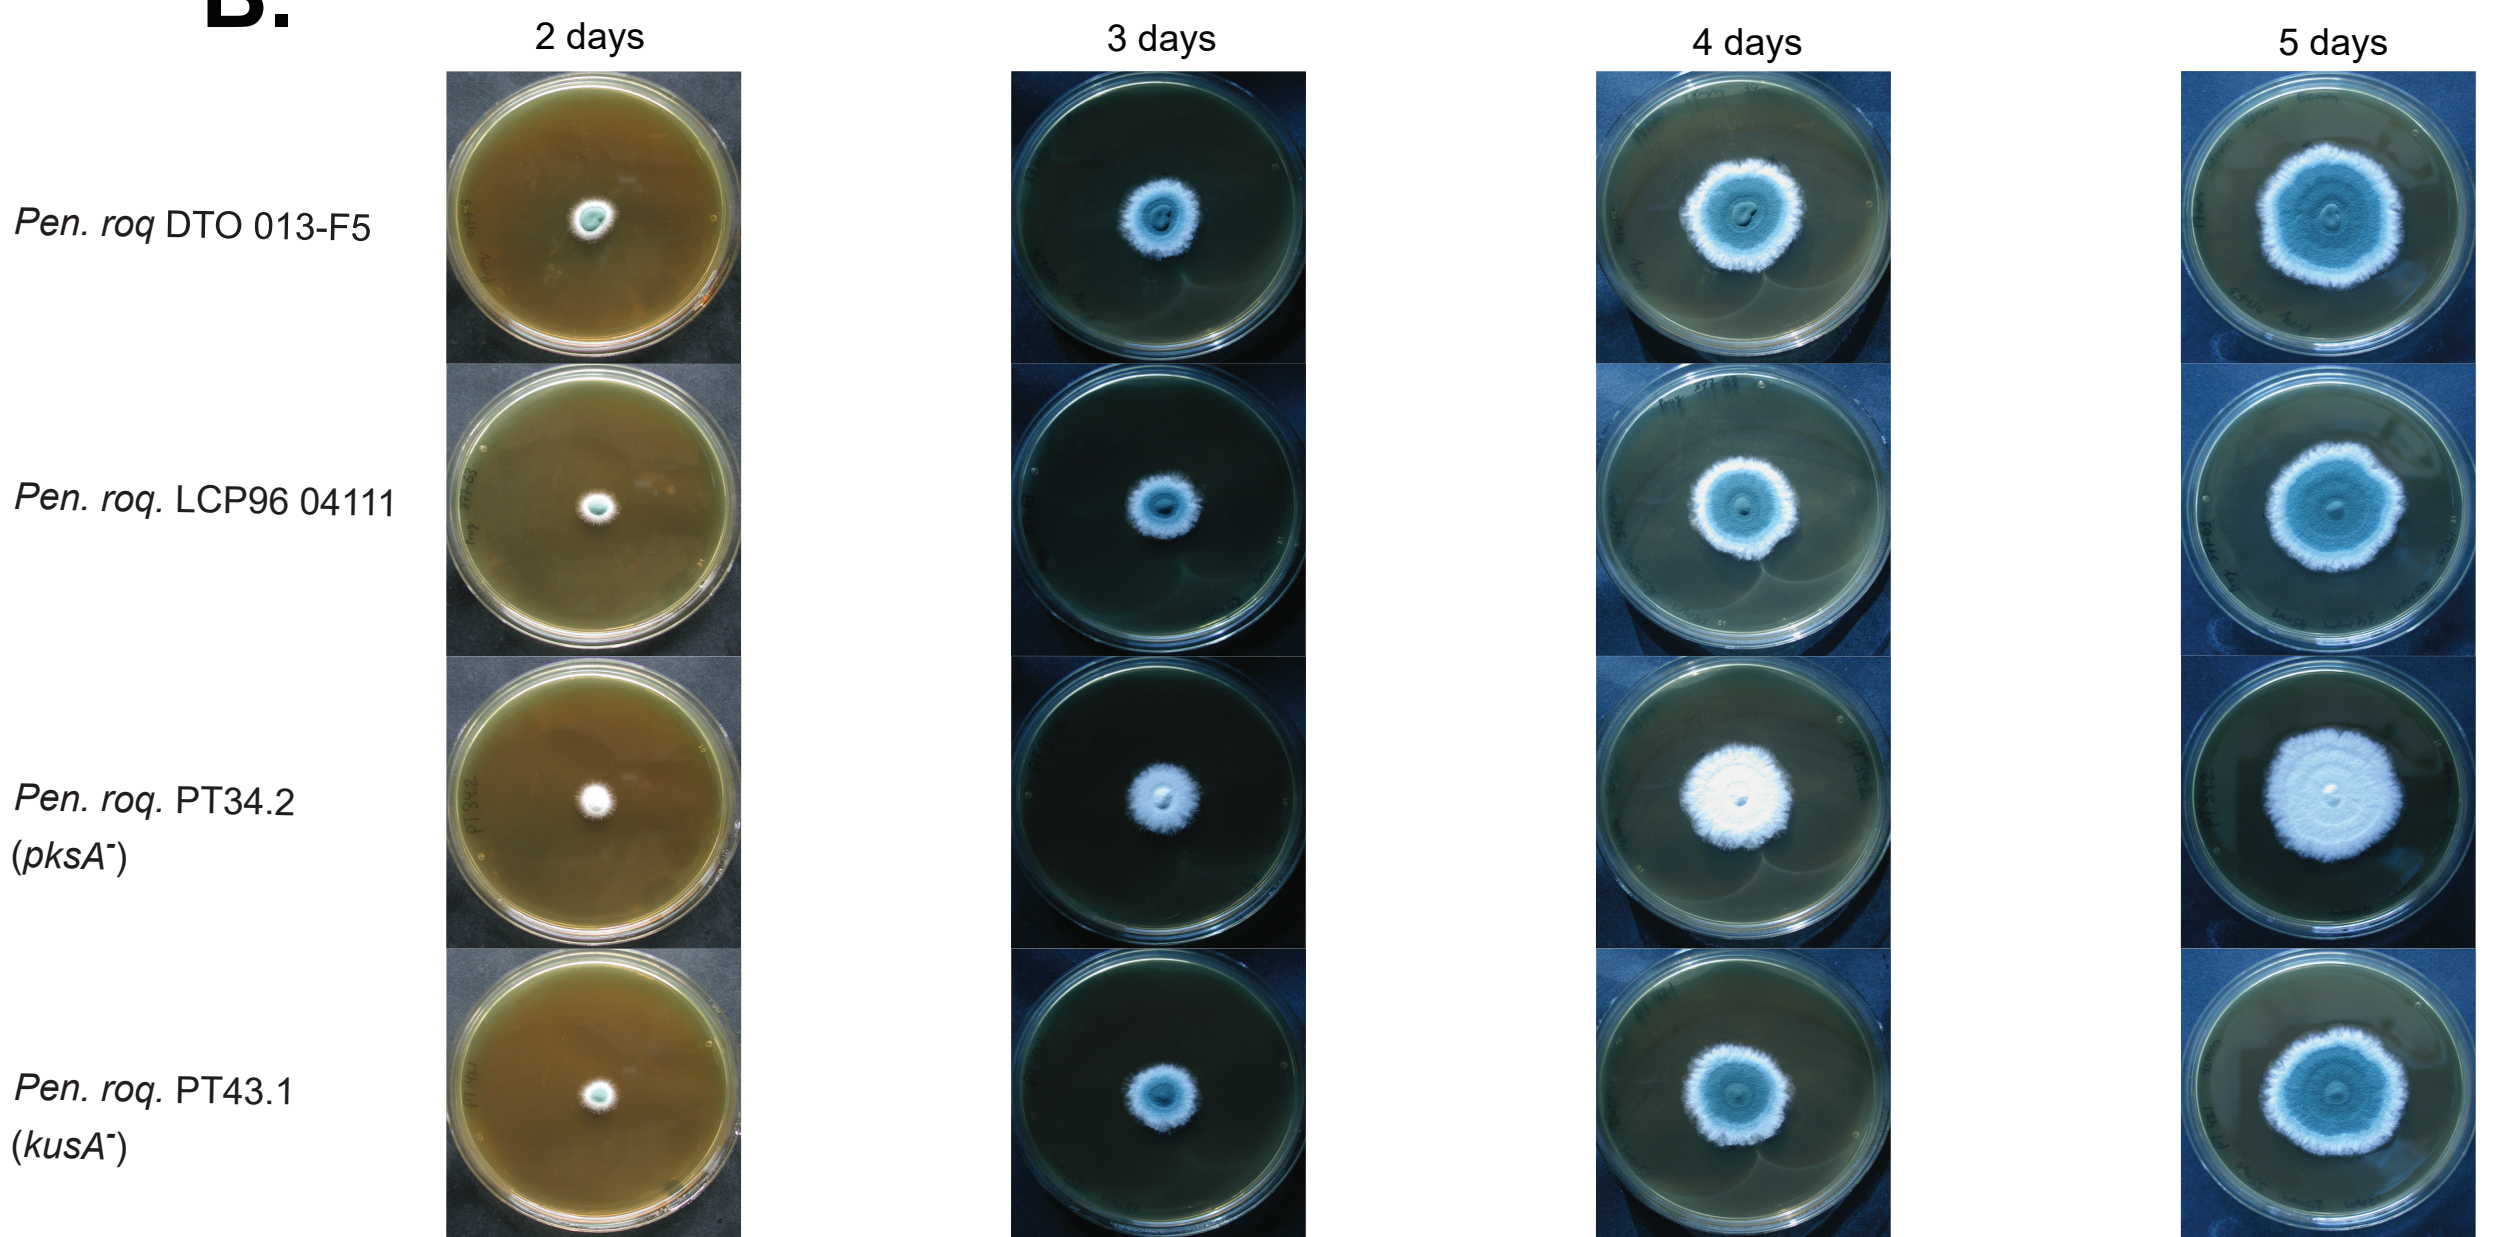**C.**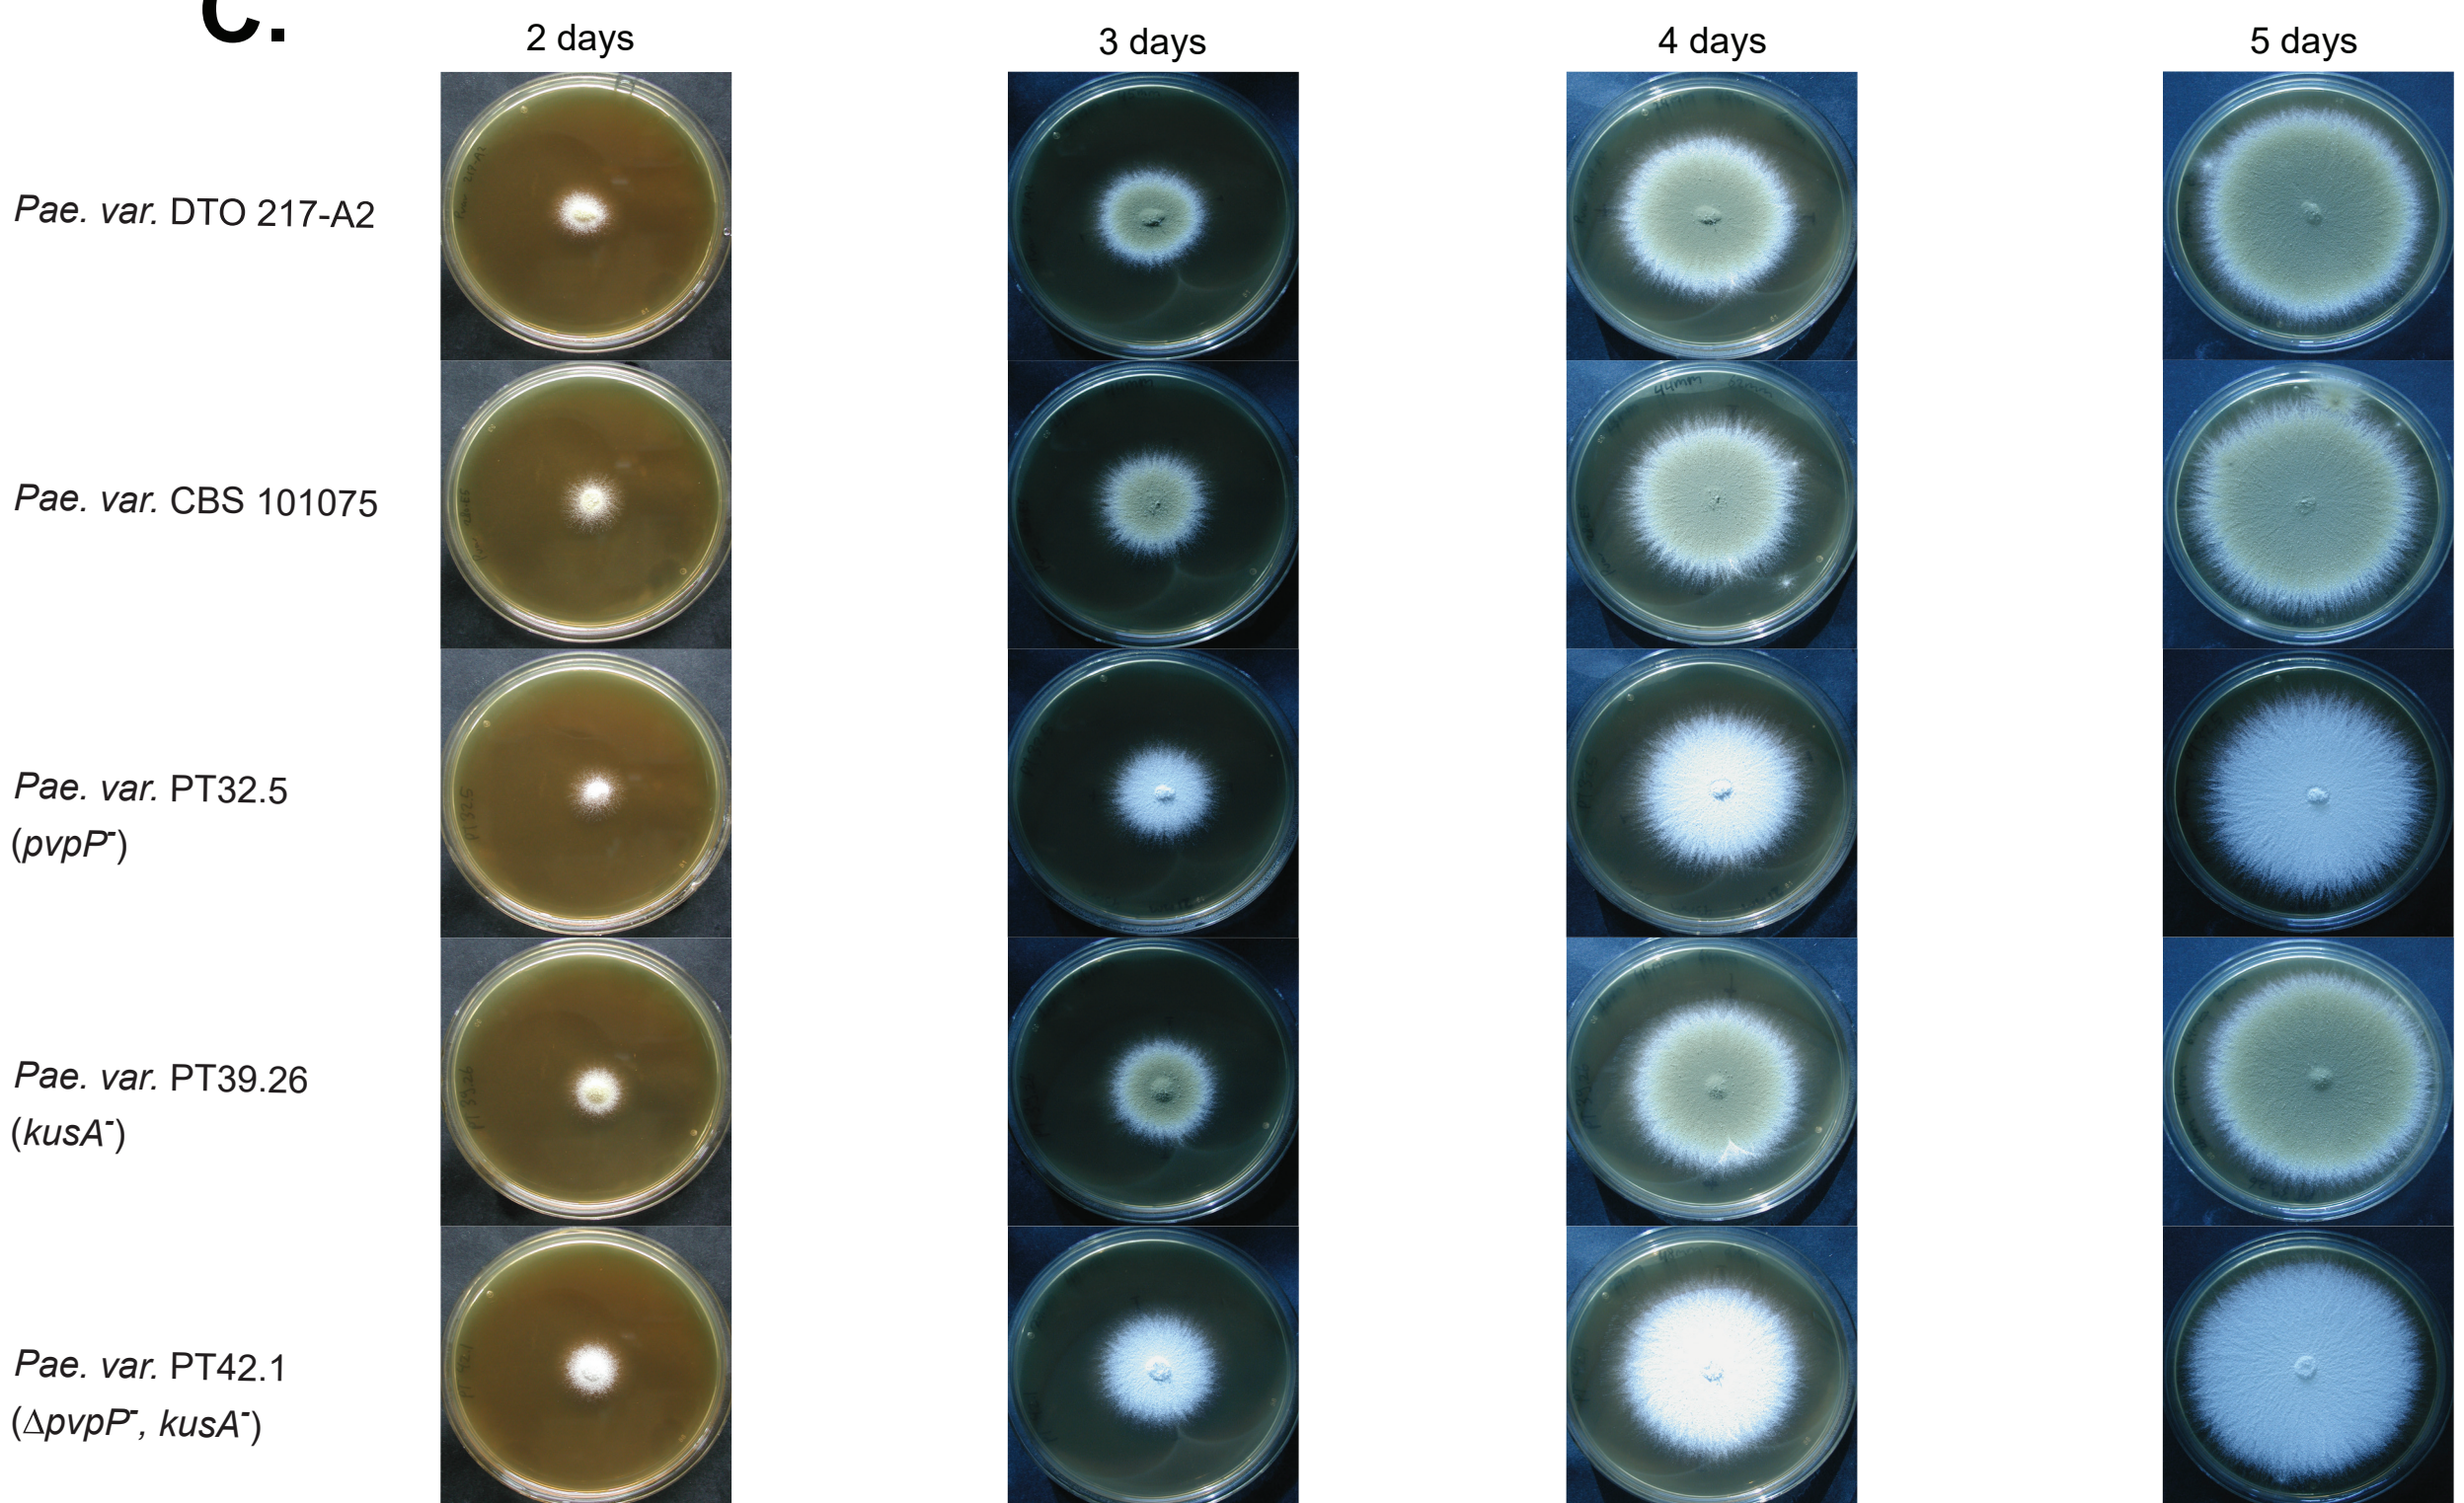

Supplement: 40694_2021_111_MOESM5_ESM.pdf [file 40694_2021_111_MOESM5_ESM.pdf]
